# Supplementary material for: Pharmacokinetic and pharmacodynamic evaluation of the atypical tetracyclines chelocardin and amidochelocardin in murine infection models
Source: PubMed Central journal article supplement (PMC10783034; doi:10.1128/spectrum.01289-23), 2023-12-04
Supplement: spectrum.01289-23-s0001.pdf [file spectrum.01289-23-s0001.pdf]

# Pharmacokinetic and pharmacodynamic evaluation of the atypical tetracyclines chelocardin and amidochelocardin in murine infection models

Running title: PK/PD profiling of chelocardin and amidochelocardin

Katharina Rox<sup>1,2</sup>, Rolf Jansen<sup>3</sup>, Tadeja Lukežič<sup>2,4</sup>, Marina Greweling-Pils<sup>5</sup>, Jennifer Herrmann<sup>2,4</sup>, Marcus Miethke<sup>2,4</sup>, Stephan Hüttel<sup>2,3</sup>, Fabienne Hennessen<sup>2,4</sup>, Antoine Abou Fayad<sup>2,4</sup>, Cornelia Holzhausen<sup>5</sup>, Carina Vingsbo Lundberg<sup>6</sup>, Joanne Teague<sup>7</sup>, Enge Sudarman<sup>3</sup>, Lisa Bülter<sup>2,8</sup>, Thomas Hesterkamp<sup>2,8</sup>, Marc Stadler<sup>2,3</sup>, Mark Brönstrup<sup>1,2,#</sup>, Rolf Müller<sup>2,4,#</sup>

## Table of content

|                                                                                                                                                |   |
|------------------------------------------------------------------------------------------------------------------------------------------------|---|
| <b>Supplemental figures</b> .....                                                                                                              | 3 |
| <b>Figure S1.</b> LC-MS/MS traces of CHD, epi-CHD and CDCHD in plasma after IV administration. ....                                            | 3 |
| <b>Figure S2.</b> Pharmacokinetic profiles of CHD and CDCHD at 15 and 30 mg/kg IV.....                                                         | 3 |
| <b>Figure S3.</b> Assessment of low doses of CHD and CDCHD in the neutropenic thigh infection model with <i>K. pneumoniae</i> .....            | 4 |
| <b>Figure S4.</b> Assessment of higher doses of CHD in the neutropenic thigh infection model with <i>K. pneumoniae</i> .....                   | 4 |
| <b>Figure S5.</b> Assessment of higher doses of CDCHD in the neutropenic thigh infection model with <i>K. pneumoniae</i> .....                 | 5 |
| <b>Figure S6.</b> Assessment of CHD and CDCHD in an ascending urinary tract infection model with display of the 95 % confidence interval. .... | 5 |

|                                                                                                                                          |   |
|------------------------------------------------------------------------------------------------------------------------------------------|---|
| <b>Figure S7.</b> Bioanalysis of terminal plasma and urine samples from the ascending urinary tract infection model. ....                | 6 |
| <b>Supplemental tables</b> .....                                                                                                         | 7 |
| <b>Table S1.</b> MIC determination of epi-CHD, CHD and CDCHD against a variety of ESKAPE pathogens. 7                                    |   |
| <b>Table S2.</b> MIC of CHD, CDCHD, gentamicin, levofloxacin and ciprofloxacin against strains used for <i>in vivo</i> testing. ....     | 7 |
| <b>Table S3.</b> Mass transitions for quantification of CDCHD and CHD using caffeine as internal standard. ....                          | 7 |
| <b>Table S4.</b> Doses and dosage regimens in the neutropenic thigh infection model with <i>K. pneumoniae</i> (low dose CHD/CDCHD). .... | 7 |
| <b>Table S5.</b> Doses and dosage regimens in the neutropenic thigh infection model with <i>K. pneumoniae</i> (high dose CHD). ....      | 8 |
| <b>Table S6.</b> Doses and dosage regimens in the neutropenic thigh infection model with <i>K. pneumoniae</i> (high dose CDCHD). ....    | 8 |
| <b>Table S7.</b> Doses and dosage regimens in the neutropenic thigh infection model with <i>E. coli</i> . ....                           | 8 |

## Supplemental figures

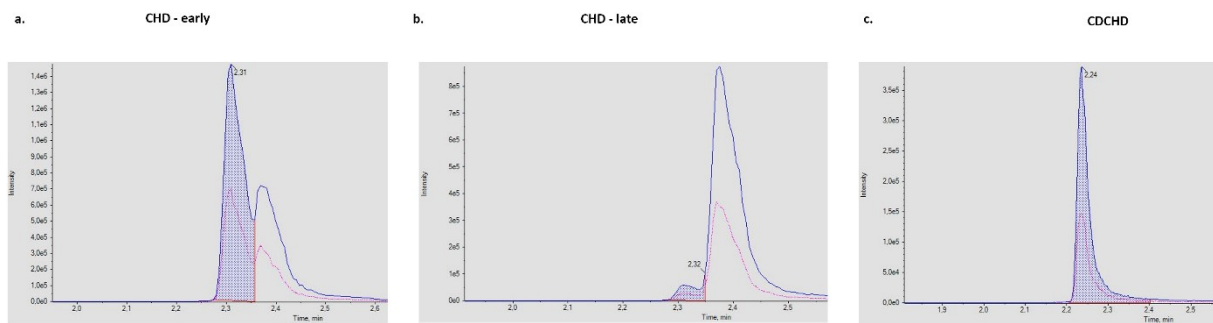

**Figure S1.** LC-MS/MS traces of CHD, epi-CHD and CDCHD in plasma after IV administration.

LC-MS/MS traces of CHD (a,b) and CDCHD (c) are displayed. CHD and epi-CHD in plasma are displayed 15 min (a) and 24 hours (b) post IV administration of 15 mg/kg. CDCHD in plasma is displayed 15 min after administration (c). The active epimer is marked in blue. Whereas the active epimer decreases for CHD (a,b), no epi-CDCHD can be found (c).

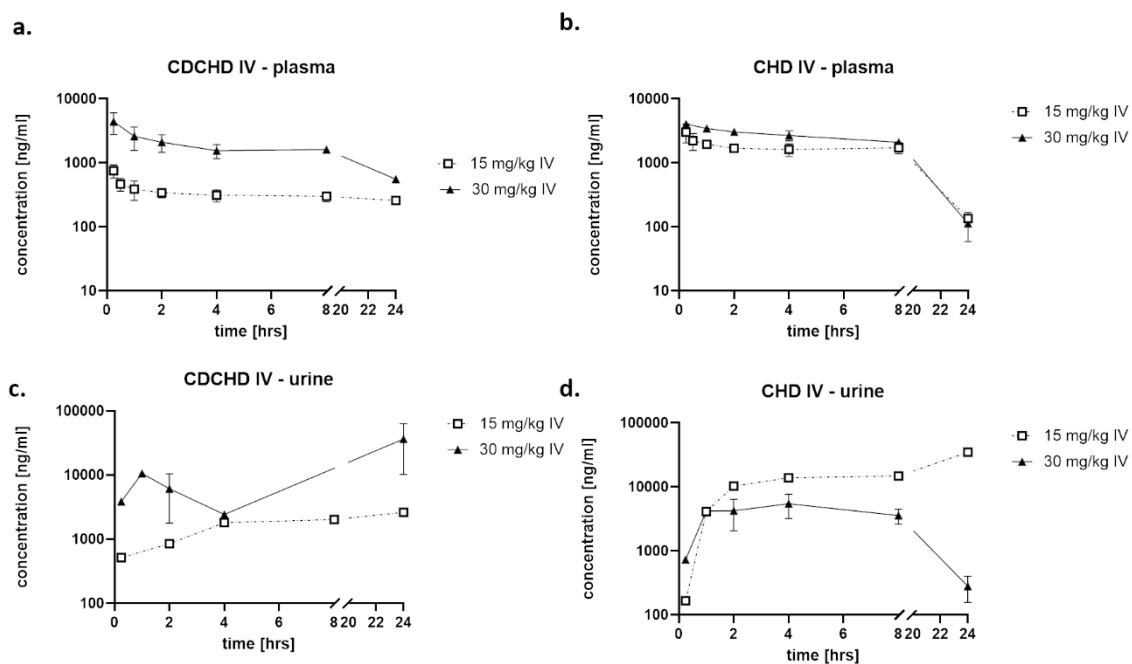

**Figure S2.** Pharmacokinetic profiles of CHD and CDCHD at 15 and 30 mg/kg IV.

CDCHD (a,c) and CHD (b,d) were administered at 15 mg/kg IV and 30 mg/kg IV, respectively. Plasma concentrations of CDCHD (a) and CHD (c) at 15 mg/kg IV (white) and 30 mg/kg IV (black) are displayed. Moreover, urine concentrations of CDCHD (b) and CHD (d) at 15 mg/kg IV (white) and 30 mg/kg IV (black) are displayed. N=3 mice were used per time point.

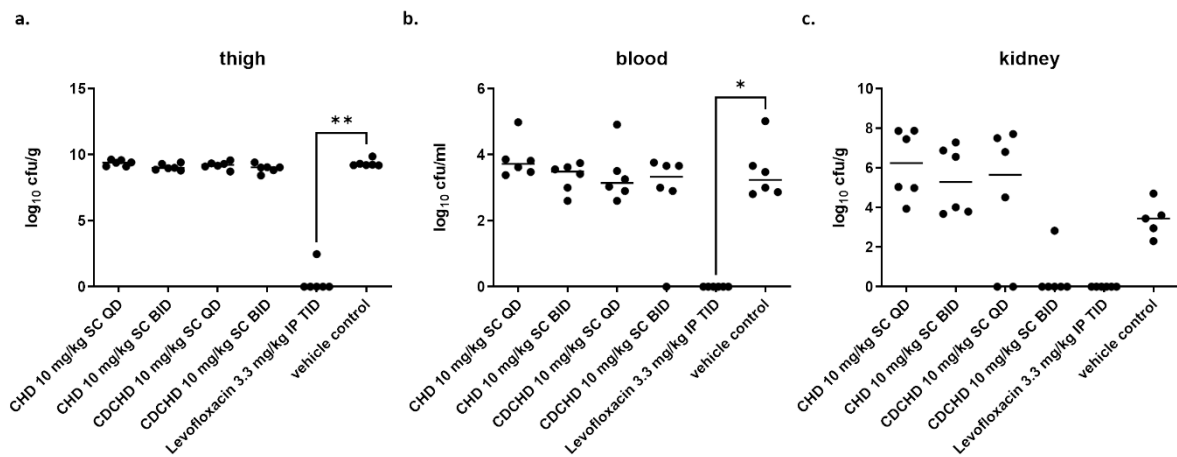

**Figure S3.** Assessment of low doses of CHD and CDCHD in the neutropenic thigh infection model with *K. pneumoniae*.

CHD and CDCHD were tested in the neutropenic thigh infection model with *K. pneumoniae* at 10 mg/kg SC QD and 10 mg/kg SC BID, respectively, against levofloxacin 3.3 mg/kg IP TID. Bacterial loads were determined in thigh (a), blood (b) and kidney (c). Bacterial loads were expressed as  $\log_{10}$  cfu/g in thigh and kidney and as  $\log_{10}$  cfu/ml in blood. Per group n=6 animals were used. Two thighs from one animal were pooled. \*:  $p < 0.05$ , \*\*  $p < 0.01$ .

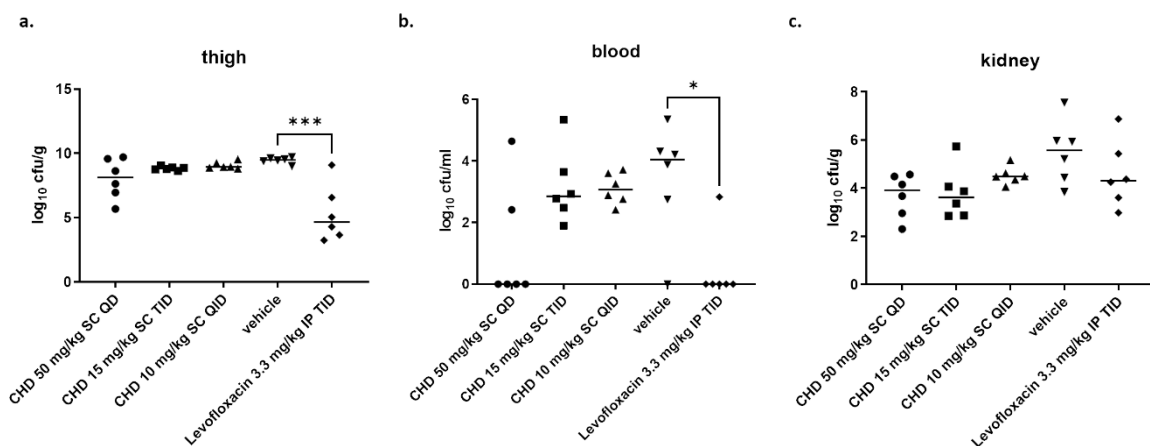

**Figure S4.** Assessment of higher doses of CHD in the neutropenic thigh infection model with *K. pneumoniae*.

CHD was tested in the neutropenic thigh infection model with *K. pneumoniae* at 50 mg/kg SC QD, 15 mg/kg SC TID and 10 mg/kg SC QID against levofloxacin 3.3 mg/kg IP TID. Bacterial loads were determined in thigh (a), blood (b) and kidney (c). Bacterial loads were expressed as  $\log_{10}$  cfu/g in thigh and kidney and as  $\log_{10}$  cfu/ml in blood. Per group n=6 animals were used. Two thighs from one animal were pooled. \*:  $p < 0.05$ , \*\*\*:  $p < 0.001$ .

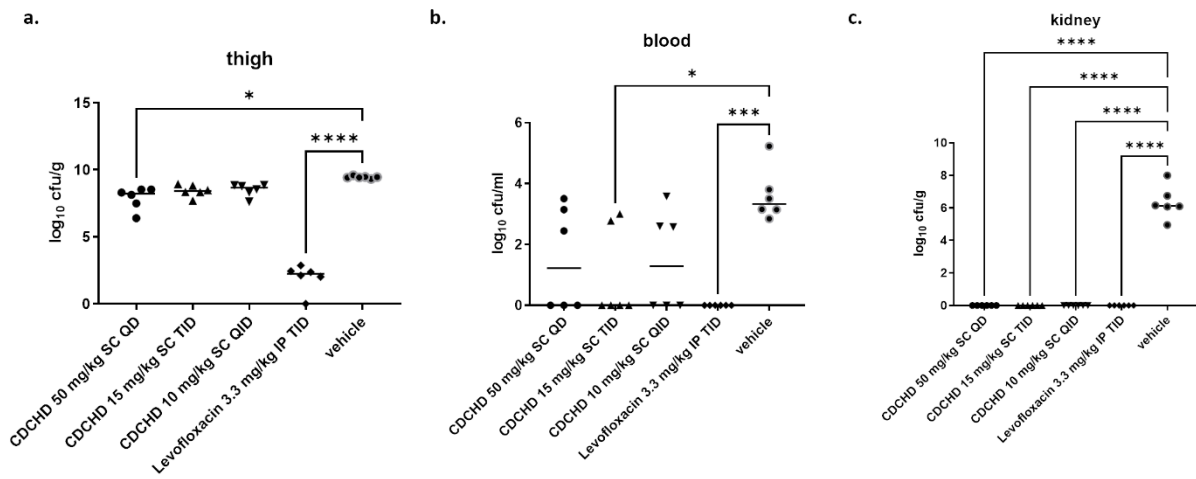

**Figure S5.** Assessment of higher doses of CDCHD in the neutropenic thigh infection model with *K. pneumoniae*.

CDCHD was tested in the neutropenic thigh infection model with *K. pneumoniae* at 50 mg/kg SC QD, 15 mg/kg SC TID and 10 mg/kg SC QID against levofloxacin 3.3 mg/kg IP TID. Bacterial loads were determined in thigh (a), blood (b) and kidney (c). Bacterial loads were expressed as  $\log_{10}$  cfu/g in thigh and kidney and as  $\log_{10}$  cfu/ml in blood. Per group n=6 animals were used. Two thighs from one animal were pooled. \*: p < 0.05, \*\*\*: p < 0.001, \*\*\*\*: p < 0.0001.

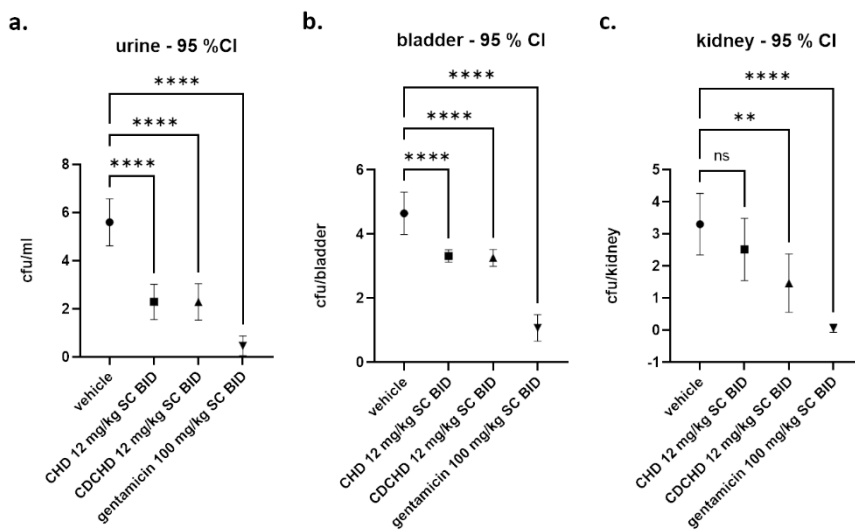

**Figure S6.** Assessment of CHD and CDCHD in an ascending urinary tract infection model with display of the 95 % confidence interval.

CHD and CDCHD were tested in an ascending urinary tract infection model with *E. coli* at 10 mg/kg SC BID against gentamicin 100 mg/kg SC BID. Bacterial loads were determined in urine (a), bladder (b) and kidney (c). Bacterial loads were expressed as  $\log_{10}$  cfu/ml in urine,  $\log_{10}$  cfu/bladder for bladder and as  $\log_{10}$  cfu/kidney for kidney. Per group n=21 animals were used. Here, the mean with the 95% confidence interval (CI) is plotted. ns : not significant, \*\*: p < 0.01, \*\*\*\* : p < 0.0001.

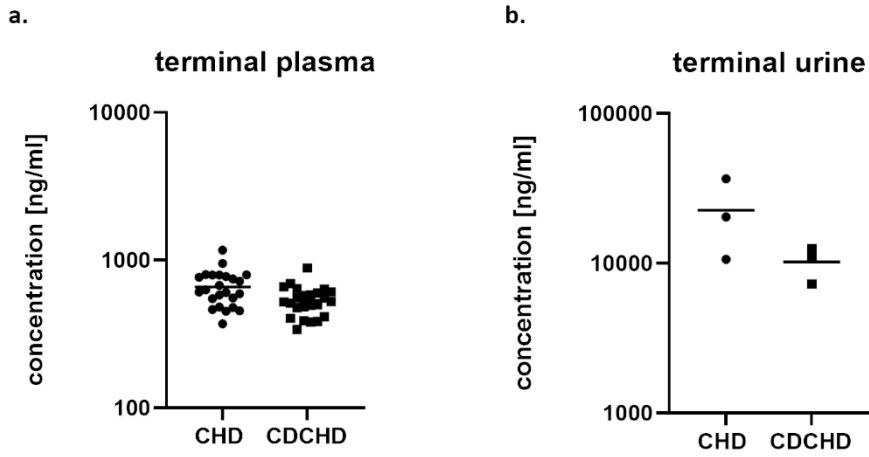

**Figure S7.** Bioanalysis of terminal plasma and urine samples from the ascending urinary tract infection model.

CDCHD and CHD were both assessed in an urinary tract infection model with *E. coli*. Terminal plasma (a) and urine (b) levels of both CHD and CDCHD are displayed. N=24 for plasma and n=3 for urine.

## Supplemental tables

**Table S1.** MIC determination of epi-CHD, CHD and CDCHD against a variety of ESKAPE pathogens.

| pathogen                       | MIC [ $\mu\text{g/ml}$ ] |      |       |
|--------------------------------|--------------------------|------|-------|
|                                | epi-CHD                  | CHD  | CDCHD |
| <i>E. faecium</i> DSM-20477    | 64                       | 4    | 2     |
| <i>S. aureus</i> DSM-346       | 16                       | 4    | 2     |
| <i>K. pneumoniae</i> DSM-30104 | 16                       | 2-4  | 1     |
| <i>A. baumannii</i> DSM-30008  | 16                       | 16   | 8     |
| <i>P. aeruginosa</i> DSM-11128 | > 64                     | > 64 | 16    |
| <i>E. aerogenes</i> DSM-30053  | 64                       | 32   | 8     |

**Table S2.** MIC of CHD, CDCHD, gentamicin, levofloxacin and ciprofloxacin against strains used for *in vivo* testing.

| pathogen                        | MIC [ $\mu\text{g/ml}$ ] |       |              |               |            |
|---------------------------------|--------------------------|-------|--------------|---------------|------------|
|                                 | CHD                      | CDCHD | levofloxacin | ciprofloxacin | gentamicin |
| <i>K. pneumoniae</i> ATCC 43816 | 5                        | 1.25  | 0.08         | -             | -          |
| <i>E. coli</i> ATCC 25922       | 2                        | 2     | -            | 0.008         | -          |
| <i>E. coli</i> C175-94          | 2                        | 2-4   | -            | -             | 0.75       |

**Table S3.** Mass transitions for quantification of CDCHD and CHD using caffeine as internal standard.

|                 | Q1 mass | Q3 mass | DP [volts] | CE [volts] | CXP [volts] |
|-----------------|---------|---------|------------|------------|-------------|
| <b>Caffeine</b> | 195.024 | 138.0   | 80.0       | 27.0       | 10.0        |
|                 |         | 110.0   | 80.0       | 31.0       | 6.0         |
| <b>CDCHD</b>    | 413.069 | 396.2   | 80.0       | 21.0       | 26.0        |
|                 |         | 378.1   | 80.0       | 21.0       | 28.0        |
| <b>CHD</b>      | 412.056 | 271.1   | 80.0       | 21.0       | 14.0        |
|                 |         | 253.1   | 80.0       | 33.0       | 16.0        |

DP: declustering potential; CE: collision energy; CXP: cell exit potential

**Table S4.** Doses and dosage regimens in the neutropenic thigh infection model with *K. pneumoniae* (low dose CHD/CDCHD).

| compound     | dose [mg/kg] | route | time points [h] |
|--------------|--------------|-------|-----------------|
| vehicle      | -            | SC    | 1, 3, 5, 7      |
| levofloxacin | 3.3          | IP    | 2, 6, 10        |
| CHD          | 10           | SC    | 2, 10           |
| CHD          | 10           | SC    | 6               |
| CDCHD        | 10           | SC    | 2, 10           |
| CDCHD        | 10           | SC    | 6               |

**Table S5.** Doses and dosage regimens in the neutropenic thigh infection model with *K. pneumoniae* (high dose CHD).

| compound     | Dose [mg/kg] | Route | time points [h] |
|--------------|--------------|-------|-----------------|
| vehicle      | -            | SC    | 1, 3, 5, 7      |
| levofloxacin | 3.3          | IP    | 2, 6, 10        |
| CHD          | 10           | SC    | 1, 3, 5, 7      |
| CHD          | 15           | SC    | 1, 4, 7         |
| CHD          | 50           | SC    | 1               |

**Table S6.** Doses and dosage regimens in the neutropenic thigh infection model with *K. pneumoniae* (high dose CDCHD).

| compound     | Dose [mg/kg] | Route | time points [h] |
|--------------|--------------|-------|-----------------|
| Vehicle      | -            | SC    | 1, 3, 5, 7      |
| levofloxacin | 3.3          | IP    | 2, 6, 10        |
| CDCHD        | 10           | SC    | 1, 3, 5, 7      |
| CDCHD        | 15           | SC    | 1, 4, 7         |
| CDCHD        | 50           | SC    | 1               |

**Table S7.** Doses and dosage regimens in the neutropenic thigh infection model with *E. coli*.

| compound      | Dose [mg/kg] | Route | time points [h] |
|---------------|--------------|-------|-----------------|
| Vehicle       | -            | IV    | 1, 6            |
| ciprofloxacin | 20           | IV    | 1, 9            |
| CHD           | 15           | IV    | 1, 6            |
| CDCHD         | 15           | IV    | 1, 6            |
| CHD           | 50           | IV    | 1               |
| CDCHD         | 50           | IV    | 1               |
